# Supplementary material
Source: publisher site journal article supplement (https://www.dovepress.com/article/298307)
Supplement: Supplementary file 1 [file get_supplementary_file.php]

## Supplementary materials

**Supplementary Table 1.** Antibodies used for the ELISA assays for the complement protein measurements

| Complement molecule | Capture Ab (clone)      | Detection Ab                              | Secondary Ab                                                       | Reference                            |
|---------------------|-------------------------|-------------------------------------------|--------------------------------------------------------------------|--------------------------------------|
| Ficolin-1           | Anti-Fic-1 FCN166       | Rabbit anti-Fic-1 HP9039 (Hycult Biotech) | Donkey anti-rabbit-horseradish peroxidase NA09340V (GE Healthcare) | Munthe-Fog L et al. <sup>37</sup>    |
| Ficolin-2           | Anti-Fic-2 FCN216       | Biotinylated anti-Fic-2 FCN219            | HRP-conjugated streptavidin (RPN1231V, Sigma)                      | Munthe-Fog L et al. <sup>38</sup>    |
| Ficolin-3           | Anti-Fic-3 FCN334       | Biotinylated anti-Fic-3 FCN334            | HRP-conjugated streptavidin (RPN1231V, Sigma)                      | Munthe-Fog L et al. <sup>39</sup>    |
| Collectin-11        | Anti-Collectin-11 HYB17 | Biotinylated anti-Collectin-11 HYB15      | HRP-conjugated streptavidin (RPN1231V, Sigma)                      | Bayarri-Olmos R et al. <sup>30</sup> |
| MBL                 | Anti-MBL HYB131-1       | Biotinylated anti-MBL HYB131-1            | HRP-conjugated streptavidin (RPN1231V, Sigma)                      | Garred P et al. <sup>40</sup>        |
| MASP-3              | Anti-MASP-3 7B8         | Biotinylated anti-MASP-1/3 7B7            | HRP-conjugated streptavidin (RPN1231V, Sigma)                      | Skjoedt MO et al. <sup>41</sup>      |
| MAP-1               | Anti-MAP-1 20C4         | Biotinylated anti-MAP-1 8B3               | HRP-conjugated streptavidin (RPN1231V, Sigma)                      | Skjoedt MO et al. <sup>33</sup>      |
| PTX3                | Anti-PTX3-20            | Biotinylated anti-PTX3-73                 | HRP-conjugated streptavidin (RPN1231V, Sigma)                      | Bastrup-Birk S et al. <sup>31</sup>  |
| C4c                 | Anti-C4c 99-72-18       | Biotinylated anti-human C4c complement    | HRP-conjugated streptavidin (RPN1231V, Sigma)                      | Pilely K et al. <sup>34</sup>        |
| C3bc                | Anti-C3b/iC3b/C3c bH6   | Rabbit anti-human C3c                     | Donkey anti-rabbit-horseradish peroxidase NA09340V (GE Healthcare) | Garred P et al. <sup>35</sup>        |
| sC5b-9              | Anti-TCC E11            | Rabbit anti-human C9 (104303E)            | Donkey anti-rabbit-horseradish peroxidase NA09340V (GE Healthcare) | Mollnes TE et al. <sup>36</sup>      |

Ab: antibody, Anti-Fic-1: ficolin-1 antibody, Anti-Fic-2: ficolin-2 antibody, Anti-fic-3: ficolin-3 antibody, anti-TCC: terminal complement complex antibody, MAP-1: MBL/ficolin/collectin associated protein 1, MASP-3: MBL/ficolin/collectin-associated serine protease 3, MBL: mannose-binding lectin, PTX-3: pentraxin-3

**Supplementary Table 2.** Results of univariate regression analysis (Pearson's correlation).

| <b>Complement component</b> | <b>Sample</b> | <b>Tested on</b> | <b>Output</b> | <b>R<sup>2</sup></b> | <b>P</b> |
|-----------------------------|---------------|------------------|---------------|----------------------|----------|
| Ficolin-1 (ng/ml)           | EDTA plasma   | Log Data         | ALSFRS-score  | 0.021                | 0.17     |
| Ficolin-2 (μg/ml)           | EDTA plasma   | Log Data         | ALSFRS-score  | 0.011                | 0.32     |
| Ficolin-3 (μg/ml)           | EDTA plasma   | Log Data         | ALSFRS-score  | 9.3e-5               | 0.93     |
| Collectin-11 (ng/ml)        | EDTA plasma   | Log Data         | ALSFRS-score  | 0.060                | 0.019    |
| MBL (ng/ml)                 | EDTA plasma   | Sqrt Data        | ALSFRS-score  | 0.0096               | 0.35     |
| MASP-3 (ng/ml)              | EDTA plasma   | Log Data         | ALSFRS-score  | 0.011                | 0.75     |
| MAP-1 (ng/ml)               | EDTA plasma   | Log Data         | ALSFRS-score  | 0.0020               | 0.68     |
| C4 (mg/ml)                  | Serum         | Data             | ALSFRS-score  | 0.031                | 0.095    |
| C4c (AU)                    | EDTA plasma   | Log Data         | ALSFRS-score  | 0.0065               | 0.45     |
| C3 (mg/ml)                  | Serum         | Log Data         | ALSFRS-score  | 0.073                | 0.0097   |
| C3bc (AU)                   | EDTA plasma   | Log Data         | ALSFRS-score  | 0.085                | 0.0051   |
| C3bc/C3                     | Index         | Log Data         | ALSFRS-score  | 0.032                | 0.090    |
| sC5b-9 (AU)                 | EDTA plasma   | Log Data         | ALSFRS-score  | 0.021                | 0.17     |
| Ficolin-3 (μg/ml)           | CSF           | Log Data         | ALSFRS-score  | 0.0077               | 0.41     |
| C3bc (AU)                   | CSF           | Log Data         | ALSFRS-score  | 0.0052               | 0.50     |
| C4c (AU)                    | CSF           | Sqrt Data        | ALSFRS-score  | 0.058                | 0.022    |

The results of the conducted PTX-3 (EDTA) and sC5b-9 (CSF) assays were not applicable for univariate regression analysis because many results were below the lower limit of detection. AU: arbitrary unit, CSF: cerebrospinal fluid, Log: logarithmically transformed, P: p value, Sqrt: square root transformed.

**Supplementary Table 3.** Univariate survival analysis for association between median survival and the complement markers ficolin.2 (EDTA), collectin-11 (EDTA), C4 (serum), C3bc (EDTA), C3bc/C3 (fraction), and sC5b-9 estimated by Cox' proportional hazards regression model.

| <b>Variable</b>            | <b>HR slope</b>       | <b>95% CI</b>                              | <b>P</b> |
|----------------------------|-----------------------|--------------------------------------------|----------|
| Ficolin-2 (µg/ml, EDTA)    | 1.02                  | 0.933-1.11                                 | 0.69     |
| Collectin-11 (ng/ml. EDTA) | 1.00                  | 0.996 – 1.00                               | 0.97     |
| C4 (mg/ml, serum)          | 1.89                  | 0.085 – 42.1                               | 0.69     |
| C3bc (AU, EDTA)            | 1.05                  | 0.887 – 1.25                               | 0.56     |
| C3bc/C3 (fraction)         | 1.01                  | 0.831 – 1.22                               | 0.96     |
| sC5b-9 (AU, EDTA)          | 1.32                  | 0.456 – 3.797                              | 0.61     |
| Ficolin-3 (µg/ml, CSF)     | $1.44 \times 10^{-8}$ | $3.7 \times 10^{-28} - 5.6 \times 10^{11}$ | 0.43     |
| C3bc (AU, CSF)             | 1.003                 | 0.996 – 1.01                               | 0.42     |

AU: arbitrary unit, CI: confidence interval, CSF: cerebrospinal fluid, EDTA: ethylenediamine tetraacetic acid, HR: hazard ratio, P: p value

**Supplementary Figure 1.** Univariate regression analysis (Pearson's correlation) of the measured PRMs, complement proteins, and activation products

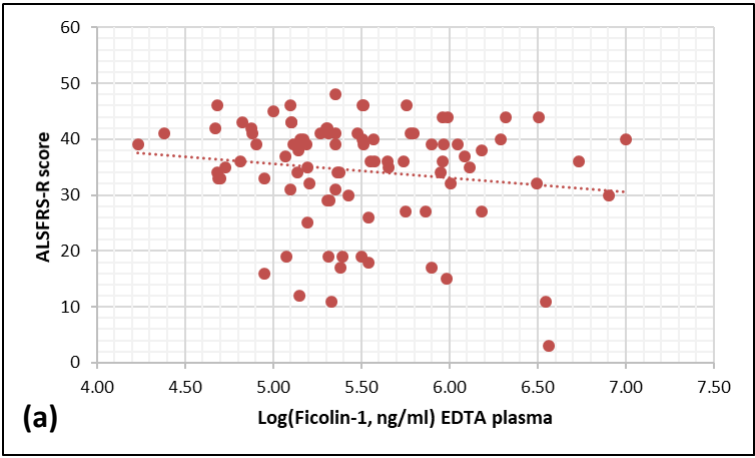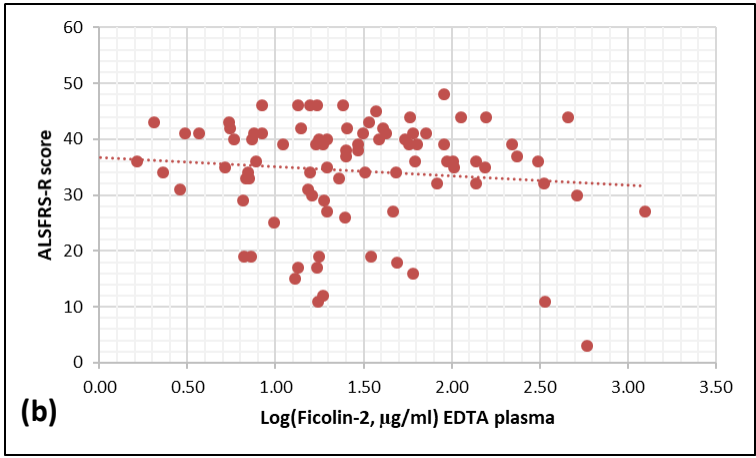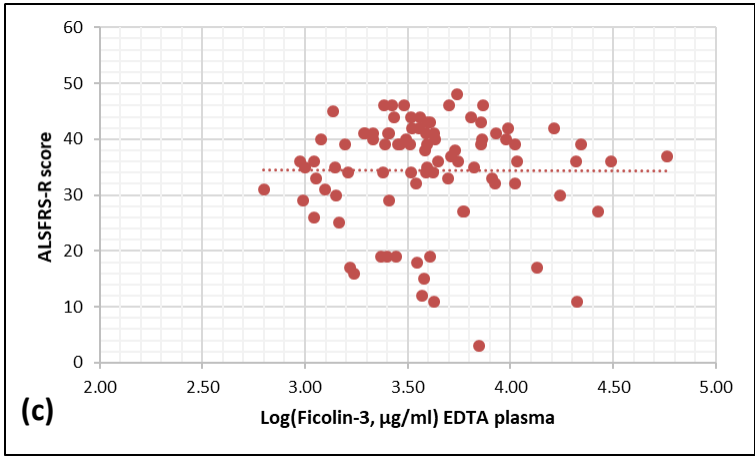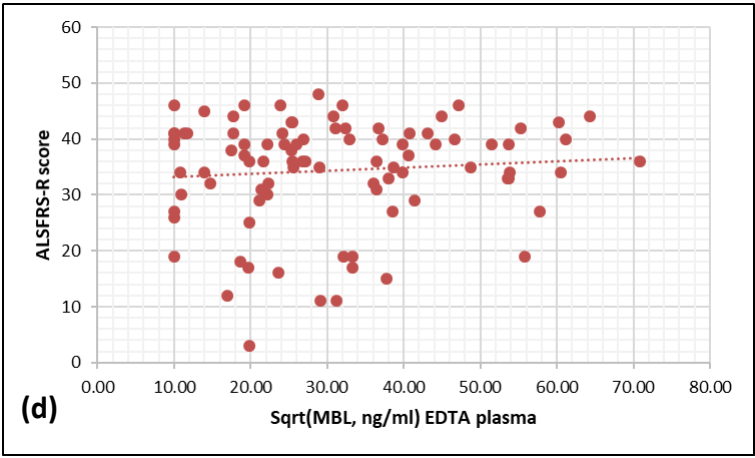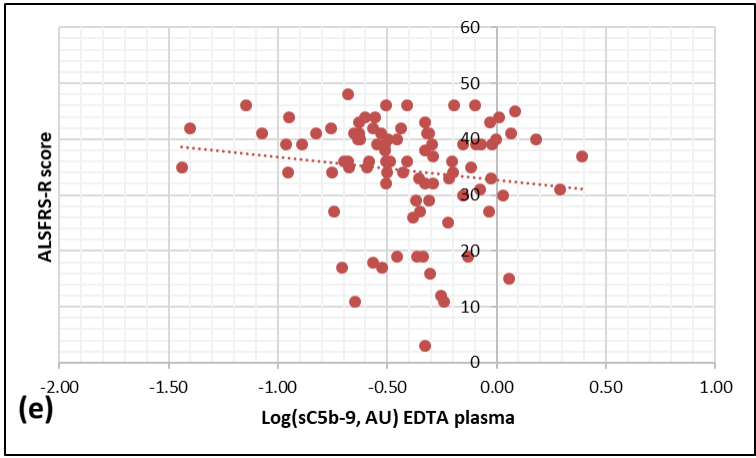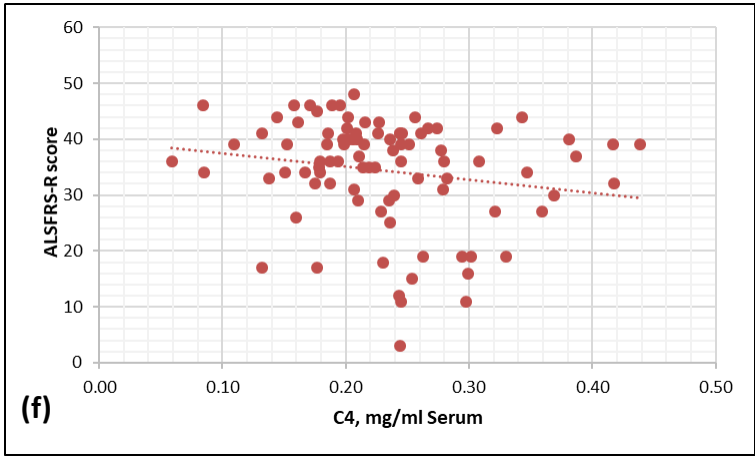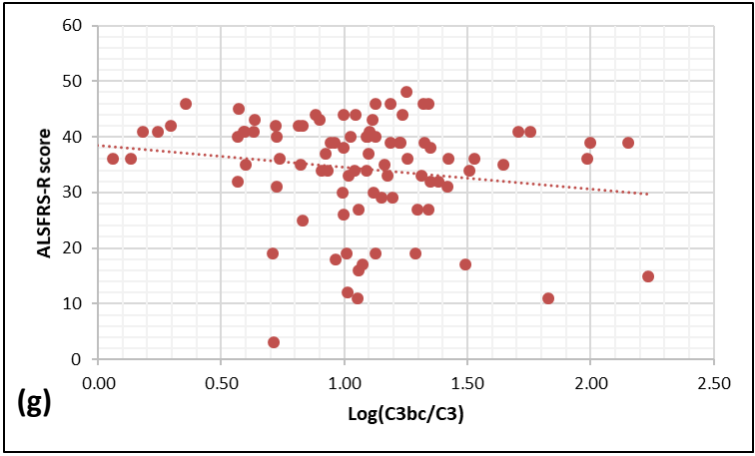

Supplementary Figure 1 (a-g) shows the ALSFRS-R score in correlation with the measured complement components in plasma/serum. The  $R^2$  and the p-values are found in Table II. ALSFRS-R: Amyotrophic lateral sclerosis functional rating scale – Revised, CSF: Cerebrospinal fluid, Log: Logarithmically transformed, PRM: Pattern recognition molecule, Sqrt: Squareroot transformed

**Supplementary Figure 2.** Univariate regression analysis (Pearson's correlation) of the measured PRMs, complement proteins, and activation products

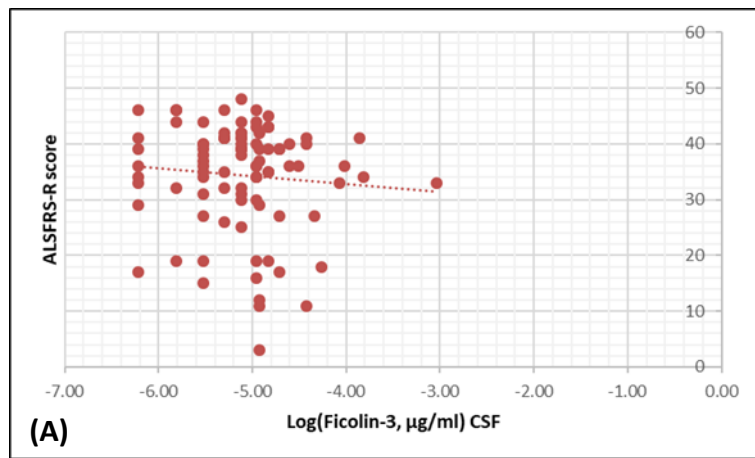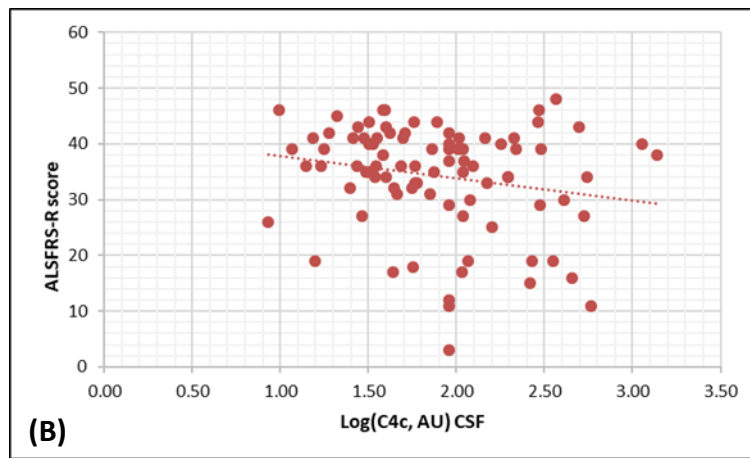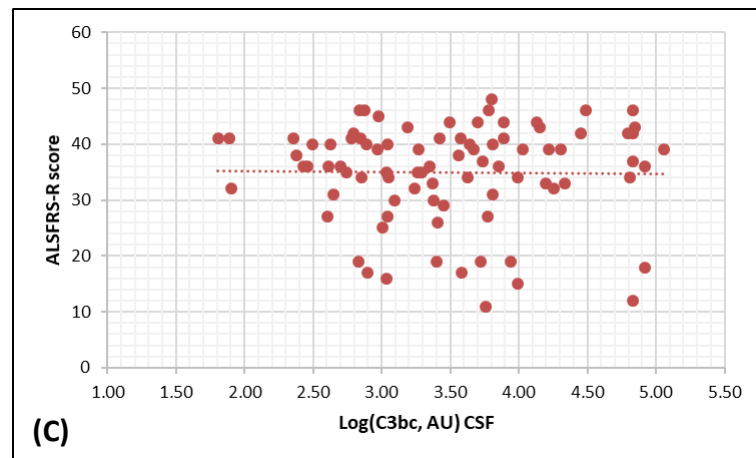

Supplementary Figure 2 (A-C) shows the ALSFRS-R score in correlation with the measured complement components in the CSF. The  $R^2$  and the p-values are found in Table II. ALSFRS-R: amyotrophic lateral sclerosis functional rating scale – revised, CSF: cerebrospinal fluid, Log: logarithmically transformed, PRM: pattern recognition molecule
